# Supplementary material for: Preparation, Characterization, and Anti-Cancer Activity of Nanostructured Lipid Carriers Containing Imatinib
Source: MDPI journal article supplement (doi:10.3390/pharmaceutics13071086), 2021-07-16
Supplement: s1 [file s1]

# Supplementary Materials: Preparation, Characterization, and Anti-Cancer Activity of Nanostructured Lipid Carriers Containing Imatinib

Hafiz A. Makeen, Syam Mohan, Mohamed Ahmed Al-Kasim, Muhammad Hadi Sultan, Ahmed A Albarraq, Rakan A. Ahmed, Hassan A. Alhazmi and Mohammad Intakhab Alam

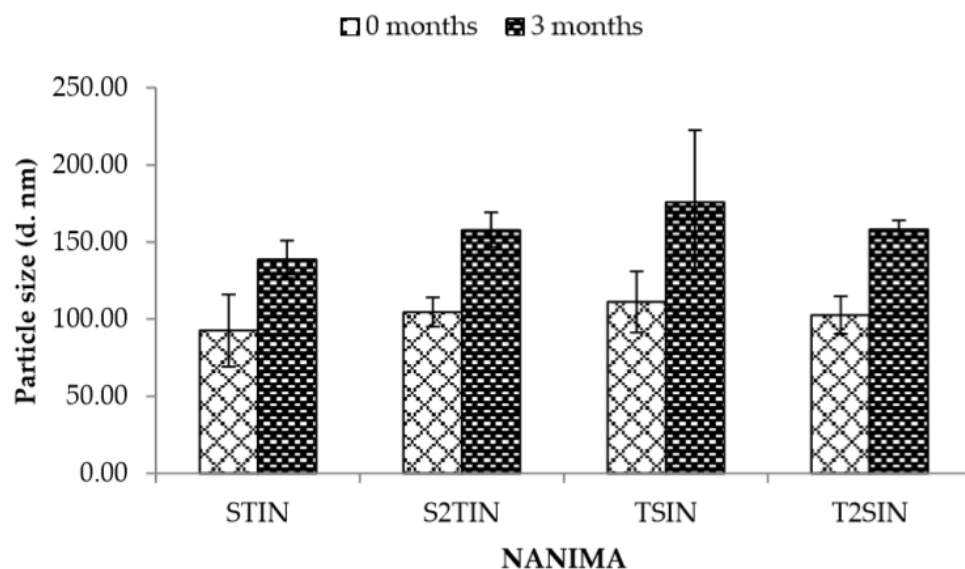

**Figure S1.** Effect of storage on the particle size of NANIMAs after three months of storage. The increase in particle size was observed to be nonsignificant in all NANIMA formulations.

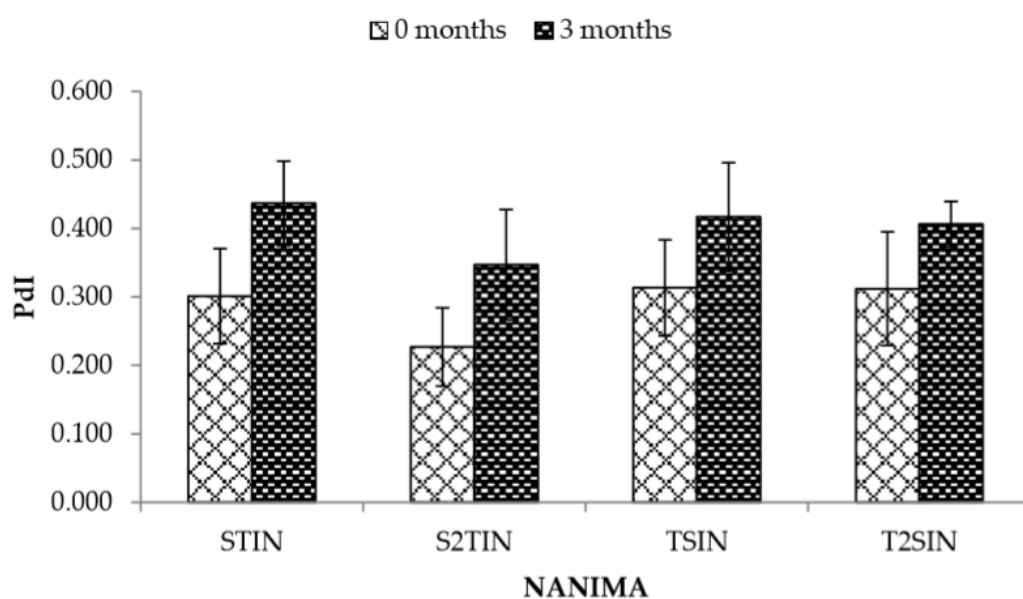

**Figure S2.** Effect of storage on the polydispersity index (PdI) of the NANIMAs after three months of storage. STIN exhibited the highest increase ( $p = 0.065$ ) and S2TIN exhibited the lowest increase among all of the NANIMAs ( $p < 0.05$ ).

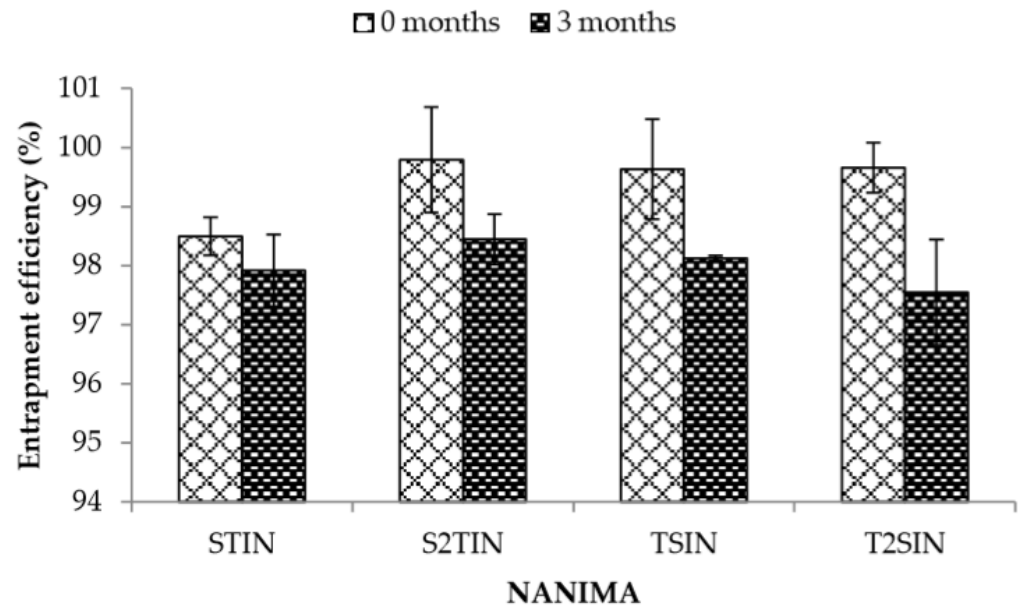

**Figure S3.** Effect of storage on the leakage of IMA from the NANIMAs after three months of storage. All of the NANIMAs were assessed to show a decrease in EE, including T2SIN ( $p < 0.05$ ), TSIN ( $p < 0.05$ ), S2TIN ( $p < 0.05$ ), and STIN ( $p > 0.05$ ).

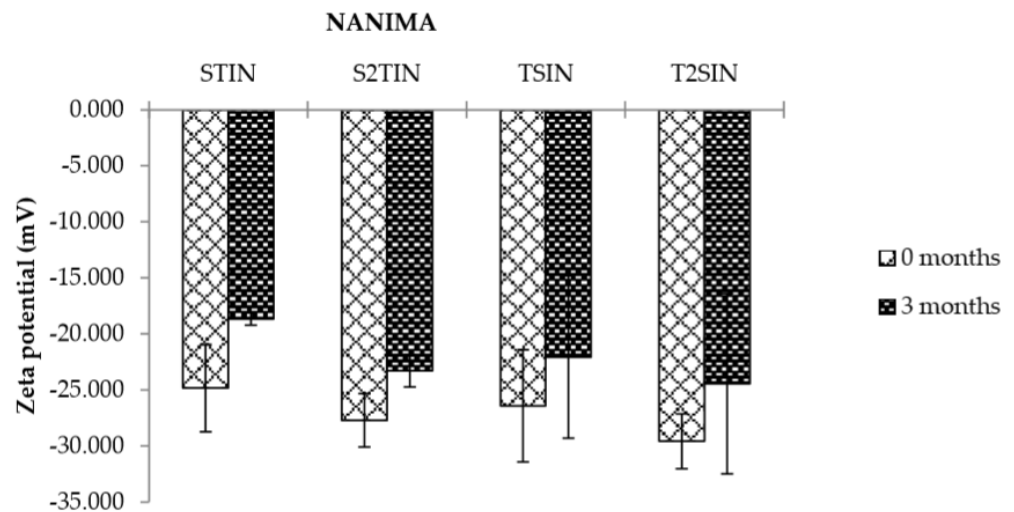

**Figure S4.** Effect of storage on the zeta potential. All of the NANIMAs were found to exhibit a nonsignificant ( $p > 0.05$ ) decrease in ZP. However, STIN exhibited a significant reduction in ZP ( $p < 0.05$ ).
